# Supplementary material
Source: PubMed Central journal article supplement (PMC9857286)
Supplement: jamainternmed-e225460-s004.pdf [file jamainternmed-e225460-s004.pdf]

## Data Sharing Statement

South. Effect of Abandoned Housing Interventions on Gun Violence, Perceptions of Safety, and Substance Use in Black Neighborhoods. *JAMA Intern Med.* Published December 05, 2022. doi:10.1001/jamainternmed.2022.5460

### Data

**Data available:** No
